# Supplementary material for: Tuning polymer-surface chemistries and interfacial interactions with UV irradiated polystyrene chains to control domain orientations in thin films of PS-b-PMMA
Source: Royal Society of Chemistry journal article supplement (doi:10.1039/c5sm02605a), 2016-01-01
Supplement: c5sm02605a1.pdf [file c5sm02605a1.pdf]

## Supporting Information

### Tuning Polymer-Surface Chemistries and Interfacial Interactions with UV Irradiated Polystyrene Chains to Control Domain Orientations in Thin Films of PS-*b*-PMMA

Ya-Sen Sun, Ching-Tun Wang, and Jiun-You Liou

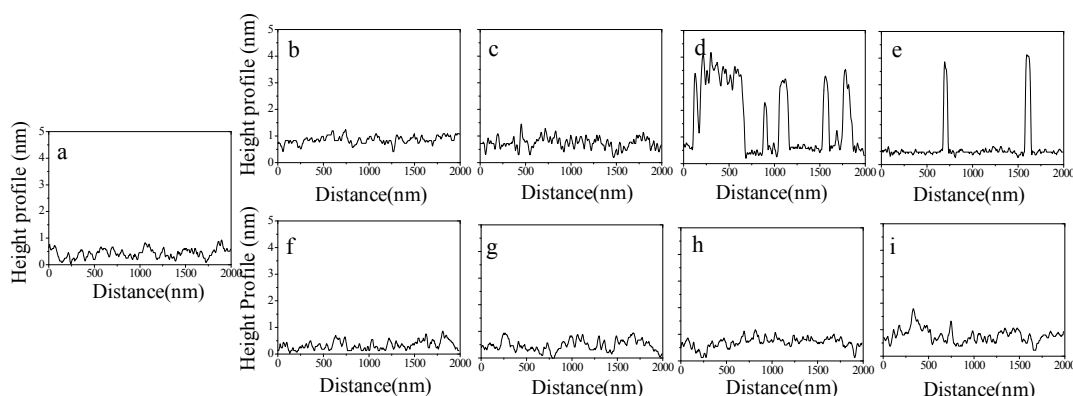

Figure S1 Cross-sectional height profiles of the AFM topographic images of PS films before (a) and after UVIA (b-e) or UVIN (f-i) of varied extent: (b&f) 10, (c&g) 60, (d&h) 360, and (e&i) 540 min.

Time period of UVIN

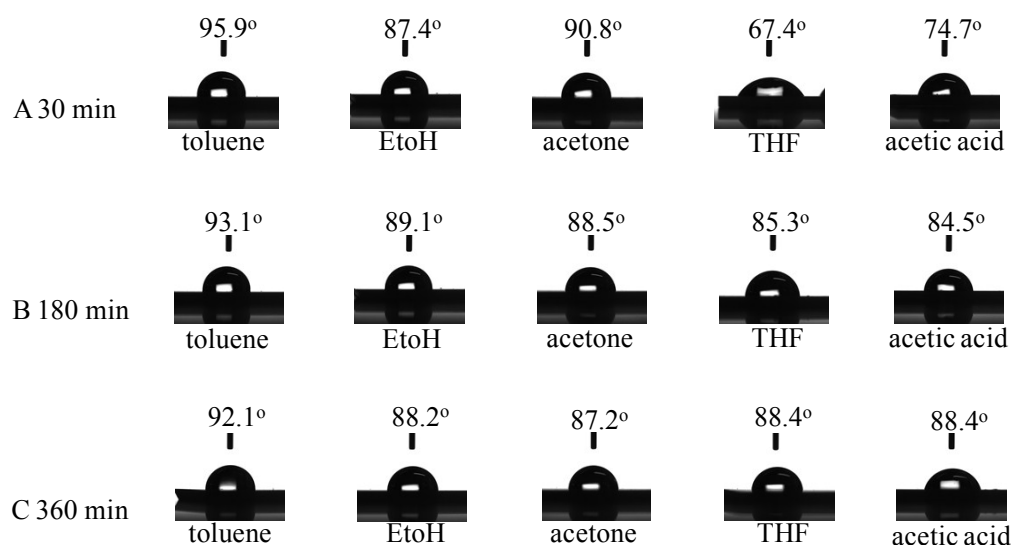

Figure S2 static contact angle of a water droplet on the surface of the PS-covered

SiOx/Si substrate after UVIN treatment of varied extent, (A) 30, (B) 180 and (C) 360 min, followed by immersion in organic solvents: toluene, ethanol, acetone, THF and acetic acid.

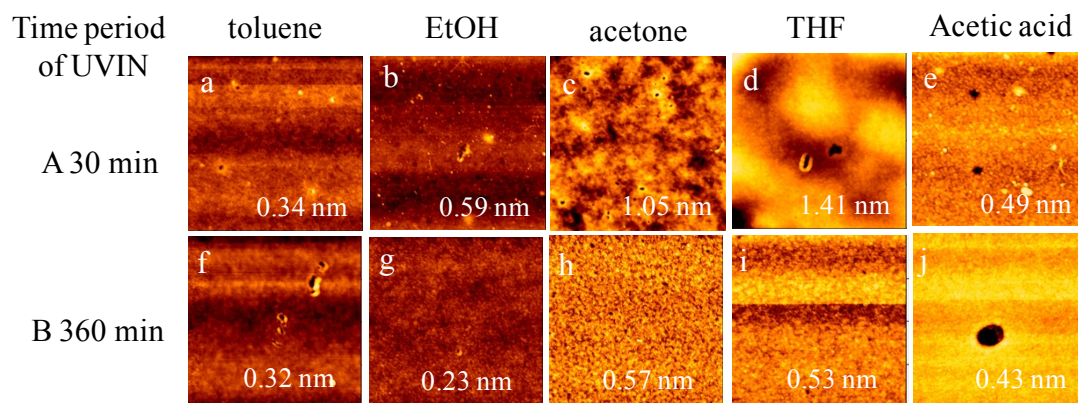

Figure S3  $2 \times 2 \mu\text{m}^2$  AFM topographic images of the surface of the PS-covered SiOx/Si substrate after UVIN treatment of varied extent, (A) 30, and (B) 360 min, followed by immersion in organic solvents: toluene, ethanol, acetone, THF and acetic acid. Mean surface roughness values measured by AFM are designated in the images.

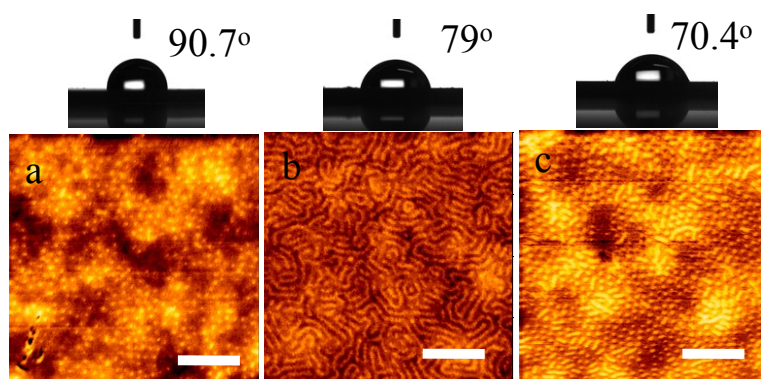

Figure S4 AFM topographic images of lamellar nanodomains of PS-*b*-PMMA on a PS film having different contact angle values: (a)  $90.7^\circ$ , (b)  $79^\circ$  and (c)  $70.4^\circ$ . Scale bar: 500 nm.

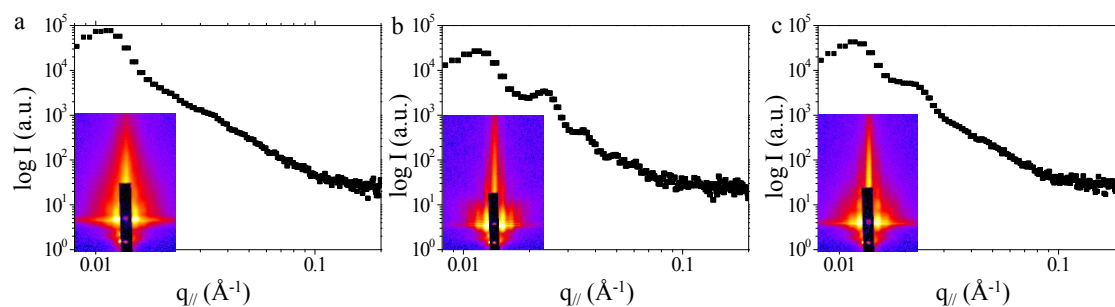

Figure S5 GISAXS 1D profiles of lamellar nanodomains of PS-*b*-PMMA on a PS film having different contact angle values: (a) 90.7°, (b) 79 ° and (c) 70.4 °. Inserts show the corresponding 2D patterns.

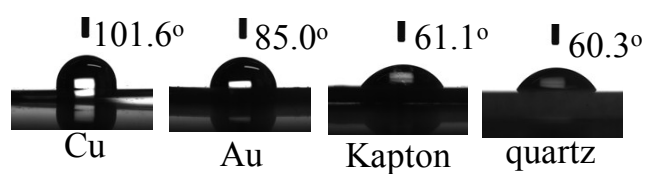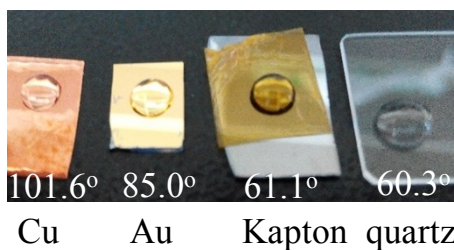

Figure S6 static contact angle of a water droplet on bare Cu, Au, Kapton and quartz.

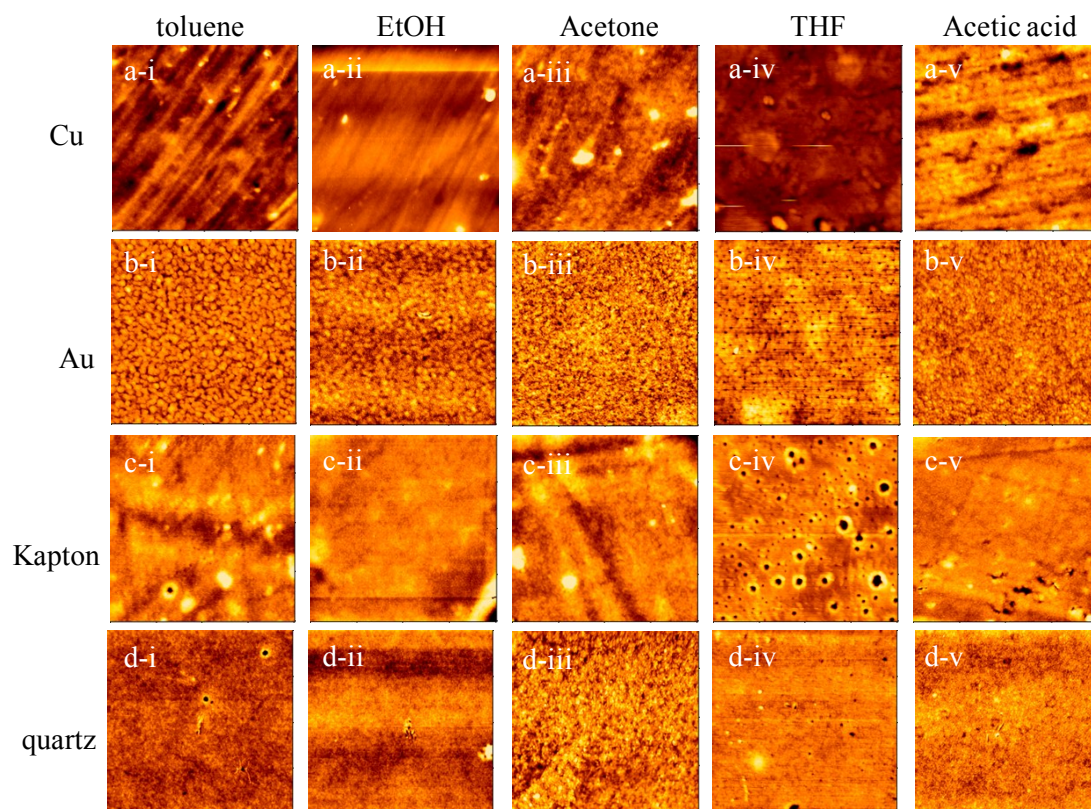

Figure S7  $2 \times 2 \mu\text{m}^2$  AFM topographic images of the surface of the PS-covered substrates of four types (such as (a) Cu, (b) Au, (c) kapton and (d) quartz) after UVIN of 6 h, followed by immersion in organic solvents: (i) toluene, (ii) ethanol, (iii) acetone, (iv) THF and (v) acetic acid.

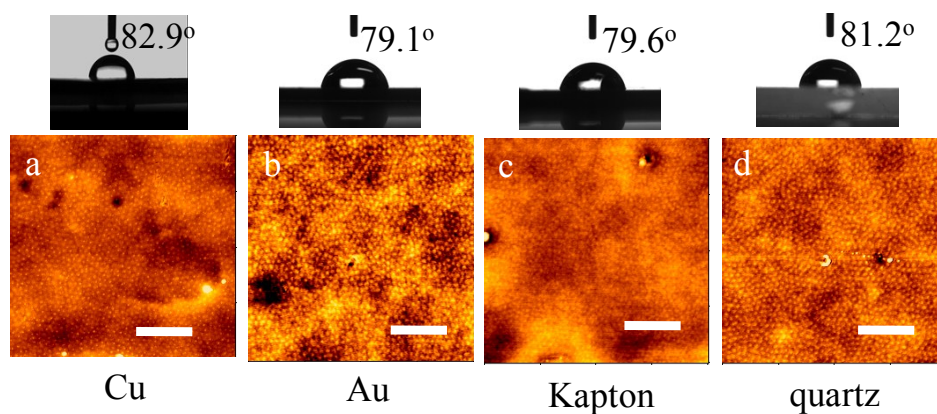

Figure S8 AFM topographic images of PS-*b*-PMMA films on a PS layer of initial thickness 7.7 nm and with a neutral surface property over (a) Cu, (b) Au, (c) Kapton, and (d) quartz. Scale bars: 500 nm.
